# Supplementary material for: Novel truncating mutations in CTNND1 cause a dominant craniofacial and cardiac syndrome
Source: PubMed Central journal article supplement (PMC7372553; doi:10.1093/hmg/ddaa050), 2020-03-20
Supplement: alharatanisuppltable1_ddaa050.pdf [file alharatanisuppltable1_ddaa050.pdf]

Table S1. Clinical details of individuals with a CTNND1 variant

| Participant                                                | Patient 1                                                                                                                        | Patient 2                                                                                                                                     | Patient 3                                                                                    | Patient 4                                                                          | Patient 5                                                                   | Patient 6                                                                                      | Patient 7                                                                                  | Patient 8                                                                                                                   | Patient 9                                                         | Patient 10                                                        | Patient 11                                                                                       | Patient 12                                                                                | Patient 13                                                                                   | TOTAL                                                                                                                      | Kievit et al 2018                  | Ghoumid et al 2017                 |    |
|------------------------------------------------------------|----------------------------------------------------------------------------------------------------------------------------------|-----------------------------------------------------------------------------------------------------------------------------------------------|----------------------------------------------------------------------------------------------|------------------------------------------------------------------------------------|-----------------------------------------------------------------------------|------------------------------------------------------------------------------------------------|--------------------------------------------------------------------------------------------|-----------------------------------------------------------------------------------------------------------------------------|-------------------------------------------------------------------|-------------------------------------------------------------------|--------------------------------------------------------------------------------------------------|-------------------------------------------------------------------------------------------|----------------------------------------------------------------------------------------------|----------------------------------------------------------------------------------------------------------------------------|------------------------------------|------------------------------------|----|
| DDD ID                                                     | NA                                                                                                                               | NA                                                                                                                                            | 294023                                                                                       | 278766 NA                                                                          | -                                                                           | -                                                                                              | 278000                                                                                     | 264418 NA                                                                                                                   | NA                                                                | NA                                                                | 265667                                                                                           | 281120 -                                                                                  | -                                                                                            | -                                                                                                                          | -                                  | -                                  |    |
| Variant                                                    | V148D>T24                                                                                                                        | V148D>T24                                                                                                                                     | R461*                                                                                        | R461*                                                                              | R797*                                                                       | L494H*                                                                                         | L494H*                                                                                     | G533A>G                                                                                                                     | S68*                                                              | S68*                                                              | L2302.SA>G                                                                                       | H813P>T3                                                                                  | H813P>T3                                                                                     | -                                                                                                                          | -                                  | -                                  |    |
| Sex                                                        | Female                                                                                                                           | Female                                                                                                                                        | Male                                                                                         | Male                                                                               | Female                                                                      | Female                                                                                         | Male                                                                                       | Female                                                                                                                      | Male                                                              | Male                                                              | Male                                                                                             | Male                                                                                      | Male                                                                                         | 67/7M                                                                                                                      | -                                  | -                                  |    |
| <b>Craniofacial</b>                                        |                                                                                                                                  |                                                                                                                                               |                                                                                              |                                                                                    |                                                                             |                                                                                                |                                                                                            |                                                                                                                             |                                                                   |                                                                   |                                                                                                  |                                                                                           |                                                                                              |                                                                                                                            |                                    |                                    |    |
| Cleft lip/palate                                           | no                                                                                                                               | no                                                                                                                                            | submucous cleft soft palate & bifid uvula                                                    | no                                                                                 | no                                                                          | yes                                                                                            | right unilateral cleft lip and palate                                                      | no                                                                                                                          | bilateral cleft lip and palate                                    | right unilateral cleft lip and palate                             | left unilateral cleft lip and palate                                                             | left unilateral cleft lip and palate                                                      | left unilateral cleft lip and palate                                                         | (8/13)                                                                                                                     | Yes                                | Yes                                |    |
| High arched palate                                         | yes                                                                                                                              | yes                                                                                                                                           | yes                                                                                          | no                                                                                 | no                                                                          | no                                                                                             | yes                                                                                        | yes                                                                                                                         | no                                                                | no                                                                | no                                                                                               | yes                                                                                       | yes                                                                                          | (7/13)                                                                                                                     | NR                                 | NR                                 |    |
| Thin upper lip                                             | yes                                                                                                                              | no                                                                                                                                            | no                                                                                           | no                                                                                 | no                                                                          | no                                                                                             | yes                                                                                        | yes                                                                                                                         | no                                                                | no                                                                | yes                                                                                              | yes                                                                                       | no                                                                                           | (2/13)                                                                                                                     | NR                                 | NR                                 |    |
| Choanal atresia                                            | bilateral                                                                                                                        | left                                                                                                                                          | no                                                                                           | no                                                                                 | no                                                                          | no                                                                                             | no                                                                                         | bilateral                                                                                                                   | no                                                                | no                                                                | right                                                                                            | no                                                                                        | no                                                                                           | (4/13)                                                                                                                     | NR                                 | NR                                 |    |
| Dysplastic ears                                            | -                                                                                                                                | low set ears                                                                                                                                  | asymmetric low set ears; overfolded helices.                                                 | slightly antverted                                                                 | no                                                                          | small                                                                                          | small                                                                                      | low set ears; overfolded helices.                                                                                           | low set; overfolded helices.                                      | low set; overfolded helices.                                      | low set; overfolded helices.                                                                     | preauricular right pit, mild conductive hearing loss bilaterally.                         | -                                                                                            | -                                                                                                                          | (9/13)                             | Yes, 1 subject                     | NR |
| Wide nasal bridge                                          | yes                                                                                                                              | no                                                                                                                                            | yes                                                                                          | no                                                                                 | no                                                                          | no                                                                                             | yes                                                                                        | yes                                                                                                                         | yes                                                               | yes                                                               | yes                                                                                              | yes                                                                                       | yes                                                                                          | (11/13)                                                                                                                    | NR                                 | NR                                 |    |
| Broad nasal tip                                            | yes                                                                                                                              | no                                                                                                                                            | yes                                                                                          | no                                                                                 | no                                                                          | no                                                                                             | yes                                                                                        | yes                                                                                                                         | yes                                                               | yes                                                               | yes                                                                                              | no                                                                                        | no                                                                                           | (7/13)                                                                                                                     | NR                                 | NR                                 |    |
| Mid-face hypoplasia                                        | yes                                                                                                                              | yes                                                                                                                                           | yes                                                                                          | no                                                                                 | no                                                                          | yes                                                                                            | yes                                                                                        | yes                                                                                                                         | no                                                                | yes                                                               | yes                                                                                              | yes                                                                                       | yes                                                                                          | (9/13)                                                                                                                     | NR                                 | NR                                 |    |
| Mandibular prognathism                                     | yes                                                                                                                              | no                                                                                                                                            | yes                                                                                          | no                                                                                 | no                                                                          | no                                                                                             | no                                                                                         | yes                                                                                                                         | no                                                                | yes                                                               | yes                                                                                              | no                                                                                        | yes                                                                                          | (5/13)                                                                                                                     | NR                                 | NR                                 |    |
| Brachycephaly                                              | no                                                                                                                               | brachycephaly                                                                                                                                 | no                                                                                           | plagioccephaly & brachycephaly                                                     | no                                                                          | no                                                                                             | no                                                                                         | no                                                                                                                          | no                                                                | no                                                                | brachycephaly                                                                                    | no                                                                                        | no                                                                                           | (3/13)                                                                                                                     | NR                                 | NR                                 |    |
| <b>Eyes and eyelids</b>                                    |                                                                                                                                  |                                                                                                                                               |                                                                                              |                                                                                    |                                                                             |                                                                                                |                                                                                            |                                                                                                                             |                                                                   |                                                                   |                                                                                                  |                                                                                           |                                                                                              |                                                                                                                            |                                    |                                    |    |
| eyelet synchia bilaterally, distichiasis & mild ectropion. | no                                                                                                                               | anlykoblepharon bilaterally, distichiasis & hyperopia.                                                                                        | narrow upslanted palpebral fissures, hooded eyelids and telecanthus, no ophthalmic concerns. | wide palpebral fissures with scleral show, hypertelorism, ectropion, distichiasis. | sleeps with eyes open; ectropion; everted outer third of the lower eyelids. | narrow palpebral fissures, anlykoblepharon, sleepes with eyes open, watery eyes, distichiasis. | narrow upslanted palpebral fissures, hooded eyelids; had a squint. No ophthalmic concerns. | narrow palpebral fissures, hooded eyelids; bilateral eyelid tags at birth; Tanykoblepharon, telecanthus.                    | narrow upslanted palpebral fissures, hooded eyelids, telecanthus. | narrow upslanted palpebral fissures, hooded eyelids, telecanthus. | narrow upslanted palpebral fissures, hooded eyelids, telecanthus.                                | narrow upslanted palpebral fissures, hooded eyelids, telecanthus. No ophthalmic concerns. | narrow upslanted palpebral fissures, hooded eyelids and telecanthus. No ophthalmic concerns. | Narrow palpebral fissures (9/13); hooded eyelids (9/13); telecanthus (7/13); mild ectropion (4/13); anlykoblepharon (3/13) | Reported BCD eyelid malformations. | Reported BCD eyelid malformations. |    |
| Highly arched eyebrows                                     | yes                                                                                                                              | yes                                                                                                                                           | no                                                                                           | no                                                                                 | no                                                                          | yes & bushy eyebrows                                                                           | yes & interrupted eyebrows                                                                 | yes                                                                                                                         | no                                                                | no                                                                | yes                                                                                              | yes                                                                                       | yes                                                                                          | (8/13)                                                                                                                     | NR                                 | NR                                 |    |
| Thin lateral eyebrows                                      | yes                                                                                                                              | no                                                                                                                                            | no                                                                                           | no                                                                                 | yes                                                                         | yes                                                                                            | yes                                                                                        | yes                                                                                                                         | no                                                                | yes                                                               | yes                                                                                              | no                                                                                        | no                                                                                           | (8/13)                                                                                                                     | NR                                 | NR                                 |    |
| <b>Dental/oral</b>                                         |                                                                                                                                  |                                                                                                                                               |                                                                                              |                                                                                    |                                                                             |                                                                                                |                                                                                            |                                                                                                                             |                                                                   |                                                                   |                                                                                                  |                                                                                           |                                                                                              |                                                                                                                            |                                    |                                    |    |
| Hypodontia                                                 | yes, 9 permanent teeth                                                                                                           | yes, 5 primary & permanent; other premolars could not be assessed at this age.                                                                | yes, 12 permanent teeth                                                                      | yes (number not determined)                                                        | yes, 3 permanent teeth                                                      | -                                                                                              | -                                                                                          | yes, 8 permanent teeth                                                                                                      | 7 missing back molars, ND                                         | 7 missing back molars, ND                                         | yes, 3 permanent teeth                                                                           | no                                                                                        | yes, 3 permanent teeth                                                                       | (8/13)                                                                                                                     | Yes                                | Yes                                |    |
| Delayed dentition                                          | yes; supernumeration of E3 with apical resorption from 24. Delayed development 34 & 44 with ankylosis submerged and resorbed 64. | yes; impacted E3 and delayed eruption of the second primary molars                                                                            | -                                                                                            | yes                                                                                | yes                                                                         | -                                                                                              | -                                                                                          | ND                                                                                                                          | ND                                                                | ND                                                                | yes, ectopic 23                                                                                  | no                                                                                        | delayed development of 21                                                                    | (6/13)                                                                                                                     | Yes                                | NR                                 |    |
| Abnormal crown form                                        | yes; mesoangular eruption of 24, fusion of teeth, long cone-shaped tooth.                                                        | yes; macrodontia of E3 & 75; supernumerary tooth in 64-65 area; tooth 53 is dysmorphic and diminutive and tooth 73 is dysmorphic and rotated. | yes; peg 22                                                                                  | no                                                                                 | yes; multiple cortical/peg teeth.                                           | -                                                                                              | disorganised teeth                                                                         | yes; peg 21, 22 and history of neonatal tooth.                                                                              | 'jointly teeth'                                                   | yes; fused incisors                                               | yes; diminutive 22                                                                               | no                                                                                        | no                                                                                           | (9/13)                                                                                                                     | Yes                                | Yes                                |    |
| <b>Limbs</b>                                               |                                                                                                                                  |                                                                                                                                               |                                                                                              |                                                                                    |                                                                             |                                                                                                |                                                                                            |                                                                                                                             |                                                                   |                                                                   |                                                                                                  |                                                                                           |                                                                                              |                                                                                                                            |                                    |                                    |    |
| Hands                                                      | NAD                                                                                                                              | NAD                                                                                                                                           | single transverse palmar crease, right hand; thumbs and fifth finger slightly shorter.       | NAD                                                                                | NAD                                                                         | small hands; short fifth finger.                                                               | small hands; short fifth finger.                                                           | single transverse palmar crease, right hand.                                                                                | NAD                                                               | NAD                                                               | NAD                                                                                              | NAD                                                                                       | NAD                                                                                          | (7/13)                                                                                                                     | No                                 | No                                 |    |
| Feet                                                       | NAD                                                                                                                              | slight 2,3-syndactyly of feet bilaterally, long halluces.                                                                                     | slight 2,3-syndactyly on feet, lateral deviated halluces.                                    | pes planus, hallux valgus.                                                         | NAD                                                                         | short toes                                                                                     | short toes                                                                                 | NAD                                                                                                                         | NAD                                                               | NAD                                                               | NAD                                                                                              | NAD                                                                                       | NAD                                                                                          | (7/13)                                                                                                                     | Yes                                | Yes                                |    |
| <b>Systemic Phenotypes</b>                                 |                                                                                                                                  |                                                                                                                                               |                                                                                              |                                                                                    |                                                                             |                                                                                                |                                                                                            |                                                                                                                             |                                                                   |                                                                   |                                                                                                  |                                                                                           |                                                                                              |                                                                                                                            |                                    |                                    |    |
| Cardiac                                                    | hypoplastic aortic arch, ASD, VSD, MVS.                                                                                          | VSD, PDA, PFO.                                                                                                                                | NAD                                                                                          | VSD, secundum ASD.                                                                 | NAD                                                                         | NAD                                                                                            | NAD                                                                                        | TDP - repair done at 4 months; pulmonary regurgitation - valve replacement at 9 years.                                      | NAD                                                               | NAD                                                               | hypoplastic aortic arch with severe CoA; postmembranous VSD; surgeries VSD at 1 month & 2 years. | NAD                                                                                       | NAD                                                                                          | (6/13)                                                                                                                     | No                                 | No                                 |    |
| Neurologic                                                 | NAD                                                                                                                              | sensory processing disorder. Quere autism & ADHD, GDD; aggressive behaviour.                                                                  | speech delay early life; autism & ADHD, LD, defiant behaviour.                               | autistic traits, poor coordination.                                                | NAD                                                                         | NAD                                                                                            | NAD                                                                                        | NAD                                                                                                                         | NAD                                                               | NAD                                                               | increasingly challenging behaviour; anxiety; parental concern re:autistic traits.                | increasingly challenging behaviour; speech and language delay; developmental delay.       | severe speech and language delay; autism; mild LD, OCD.                                      | mild LD.                                                                                                                   | (8/13)                             | No                                 | No |
| Voice anomaly                                              | no                                                                                                                               | nasal speech                                                                                                                                  | no                                                                                           | no                                                                                 | no                                                                          | no                                                                                             | no                                                                                         | no                                                                                                                          | no                                                                | no                                                                | no                                                                                               | no                                                                                        | no                                                                                           | (3/13)                                                                                                                     | No                                 | No                                 |    |
| Other skeletal anomalies                                   | severe scoliosis                                                                                                                 | -                                                                                                                                             | delayed fontanelle closure                                                                   | joint laxity                                                                       | -                                                                           | scoliosis as an adult; short stature                                                           | -                                                                                          | -                                                                                                                           | -                                                                 | -                                                                 | stridor; hoarseness                                                                              | no                                                                                        | no                                                                                           | (5/13)                                                                                                                     | No                                 | No                                 |    |
| Cancer                                                     | no                                                                                                                               | no                                                                                                                                            | no                                                                                           | no                                                                                 | no                                                                          | no                                                                                             | no                                                                                         | ovarian dysgerminoma at 12 years of age; stage III in the left ovary; underwent left oophorectomy followed by chemotherapy. | no                                                                | no                                                                | no                                                                                               | no                                                                                        | no                                                                                           | (1/13)                                                                                                                     | No                                 | No                                 |    |
| <b>Others</b>                                              | restrictive lung disease                                                                                                         | partial agenesis of the corpus callosum                                                                                                       | velopharyngeal insufficiency; early onset puberty; bowel problems infant toddler years       | -                                                                                  | -                                                                           | hypothyroid                                                                                    | abnormal nasal morphology; had rhinoplasty for a collapsed nose                            | macroglossia (enlarged tongue)                                                                                              | glue ear                                                          | glue ear                                                          | cryptorchidism on the left side; multiple grommets                                               | coronal hypoplasias (repaired); monozygotic twin of Patient 13                            | monozygotic twin of Patient 12                                                               | -                                                                                                                          | No                                 | No                                 |    |

Abbreviation: DDD ID, Deciphering Developmental Disorders patient identification number; NA, not applicable; NAD, no abnormality detected; ND, not determined because of non-availability; 23, upper left permanent canine; 63, upper left primary canine; 24, upper left permanent first premolar; 34, lower left permanent first premolar; 44, lower right permanent first premolar; 84, lower right primary first molar; 22, upper left permanent lateral incisor; 21, upper left permanent central incisor; 75, lower left primary second molar; 73, lower left primary canine; 64, upper left primary first molar; 65, upper left primary second molar; VSD,
