# Supplementary material for: Novel truncating mutations in CTNND1 cause a dominant craniofacial and cardiac syndrome
Source: PubMed Central journal article supplement (PMC7372553; doi:10.1093/hmg/ddaa050), 2020-03-20
Supplement: alharatanisuppltable2_ddaa050.pdf [file alharatanisuppltable2_ddaa050.pdf]

**Table S2. Reported congenitally missing teeth**

| <b>Patient ID</b> | <b>Missing teeth</b>                                              |
|-------------------|-------------------------------------------------------------------|
| Patient 1         | <i>16</i> , 15, <b>23</b> , 25, 26, 36, <b>35</b> , 45, <i>46</i> |
| Patient 2         | 54, 84 and <b>23</b> , 36, 44                                     |
| Patient 3         | 15, 14, 12, 11, 21, 24, 25, <b>35</b> , 31, 41, 44, 45            |
| Patient 5         | 23,25, 45                                                         |
| Patient 8         | <i>16</i> , 15, <b>23</b> , 25, 26, 36, <b>35</b> , 45            |
| Patient 11        | 15, <b>35</b> , 45                                                |
| Patient 13        | 22, <b>35</b> , 45                                                |

Missing permanent canines are in bold and missing permanent first molars are in italics.
